# Supplementary material for: Study on drying kinetics, antioxidant activity, total bioactive compounds, physicochemical properties and microstructural characteristics of dehydrated star fruits ( Averrhoa carambola ) by different drying methods
Source: Royal Society of Chemistry journal article supplement (doi:10.1039/d3fb00024a), 2023-01-01
Supplement: d3fb00024a1.pdf [file d3fb00024a1.pdf]

## Supporting Information

### Study on drying kinetics, antioxidant activity, total bioactive compounds, physicochemical properties and microstructural characteristics of dehydrated star fruits by different drying methods (*Averrhoa carambola*)

Jayanti Dhara<sup>1</sup>, Suman kumar Saha<sup>1</sup>, Madhumita Saha<sup>1</sup>, Runu Chakraborty<sup>1\*</sup>

<sup>1</sup>Department of Food Technology and Biochemical Engineering, Jadavpur University,  
Kolkata, India.

\*Correspondence: [crunu@hotmail.com](mailto:crunu@hotmail.com)

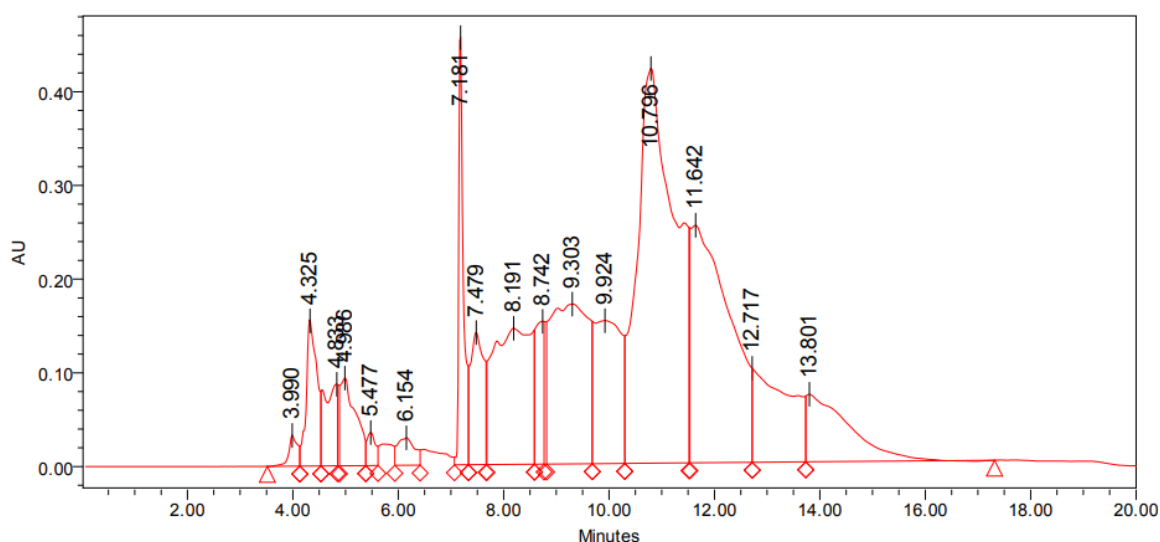

**Figure S1:** HPLC chromatogram of star fruits, ascorbic acid (3.990), picomeric acid (4.325), dihydroxybenzoic acid (4.986), catechin (5.477), caffeic acid (6.154), chlorogenic acid (7.181), vanillic acid (7.479), rutin (8.191), elachic acid (8.742), sinapic acid (9.303), tannic acid (9.942), trans-Cinnamamic acid (10.796), myricetin (11.642), apigenin (12.717), kaempferal (13.801).
